# Supplementary material
Source: PubMed Central journal article supplement (PMC5500460)
Supplement: NIHMS866949-supplement-supplement_1.pdf [file NIHMS866949-supplement-supplement_1.pdf]

**Supplemental Table 1. Primers Used for *ABCC2* Site-Directed Mutagenesis**

|        | Forward (5'-3')                         | Reverse (5'-3')                         |
|--------|-----------------------------------------|-----------------------------------------|
| C-24T  | TAGAAGAGTCTTTGTTCCAGACGCAGTCCAGG        | CCTGGACTGCGTCTGGAACAAAGACTCTTCTA        |
| G1249A | GCCAGGAAGGAGTACACCATTGGAGAAACAGTGAA     | TTCACTGTTTCTCCAATGGTGTACTCCTTCCTGGC     |
| C2366T | TGAATGACCCCTGTTTGCAGTGGATGCTCATGTAG     | CTACATGAGCATCCACTGCAAACAGGGGGTCATCTA    |
| G3542T | GCCTTTGAGCACCAGCAGCTATTTCTGAAACACAAT    | ATTGTGTTTCAGAAATAGCTGCTGGTGCTCAAAGGC    |
| T3563A | CTGAAACACAATGAGGAGAGGATTGACACCAACCAG    | CTGGTTGGTGTCAATCCTCTCCTCATTGTGTTTCAG    |
| C3972T | GAGGGATCACTTGTGACATTGGTAGCATGGAGAAGATTG | CAATCTTCTCCATGCTACCAATGTCACAAGTGATCCCTC |
| G4544A | CGGGAAGATTATAGAGTACGGCAGCCCTGAAGAAGCTG  | CAGTTCTTCAGGGCTGCCGTACTCTATAATCTTCCCG   |
